# Supplementary material for: Prevalence and predictors of initial oral antibiotic treatment failure in adult emergency department patients with cellulitis: a pilot study
Source: HighWire-hosted journal article supplement (doi:10.1136/bmjopen-2015-008150), 2015-06-01
Supplement: bmjopen-2015-008150supp.pdf [file bmjopen-2015-008150supp.pdf]

## **CASE REPORT FORM**

|                      |                                                             |
|----------------------|-------------------------------------------------------------|
| <b>Page 2 and 3:</b> | To be completed by first study recruiter                    |
| <b>Page 4:</b>       | To be completed by patient                                  |
| <b>Page 5:</b>       | To be completed by second study recruiter *                 |
| <b>Page 6:</b>       | To be completed by Principal Investigator / Co-Investigator |

- **10% of all study forms must be completed by a second study recruiter.**
- The second study recruiter must fulfill the following criteria:
  1. Be independent and blinded to the first recruiter's case report form.
  2. Be blinded to the final decision to prescribe oral or IV antibiotics for the patient.

## First Study Recruiter

**Please complete the following in addition to your ED clinical records and assist the patient with the questionnaire as needed.**

Date: \_\_\_/\_\_\_/\_\_\_\_\_

Time: \_\_\_\_\_

Consent obtained?    Yes  No

**If no, what is the reason for not enrolling the patient?**

Refused consent?

No telephone?

Social reasons (e.g. homeless)?

---

---

**Patient enrolment ID number:** \_\_\_\_\_

Was the patient taking oral antibiotics prior to ED attendance? \_\_\_\_\_ Yes  No

If yes, Name \_\_\_\_\_ Dose \_\_\_\_\_ Duration \_\_\_\_\_ in days

Temp \_\_\_ . \_\_\_ °C

Capillary blood glucose (if done) \_\_\_\_\_ mmol/L

HR \_\_\_\_\_ / min

CRP (if done) \_\_\_\_\_ mmol/L

BP \_\_\_\_\_ / \_\_\_\_\_ mmHg

WCC (if done) \_\_\_\_\_ mmol/L

RR \_\_\_ / min

SpO<sub>2</sub> \_\_\_ %

Level of awareness:    Alert     Voice     Pain     Unresponsive

## First Study Recruiter

**Patient enrolment ID number:** \_\_\_\_\_

|                                                                         |                                  |                          |
|-------------------------------------------------------------------------|----------------------------------|--------------------------|
| Location of infection _____                                             |                                  |                          |
| Lesion size:                                                            |                                  |                          |
| Length ("aligned head to toe") _____ cm                                 | Width ("maximum diameter") _____ |                          |
|                                                                         | <b>Yes</b>                       | <b>No</b>                |
| Purulent discharge                                                      | <input type="checkbox"/>         | <input type="checkbox"/> |
| Fluctuance from abscess                                                 | <input type="checkbox"/>         | <input type="checkbox"/> |
| Lymphangitis                                                            | <input type="checkbox"/>         | <input type="checkbox"/> |
| Ulcer                                                                   | <input type="checkbox"/>         | <input type="checkbox"/> |
| Wound (surgical or traumatic)<br>Please specify _____                   | <input type="checkbox"/>         | <input type="checkbox"/> |
| Athletes' Foot<br>(Interdigital skin breakdown/exudate in >1 web space) | <input type="checkbox"/>         | <input type="checkbox"/> |
| Fungal nail infection in affected leg (if applicable)                   | <input type="checkbox"/>         | <input type="checkbox"/> |
| Skin breakdown due to underlying skin condition                         | <input type="checkbox"/>         | <input type="checkbox"/> |
| Chronic limb oedema (including lymphoedema)                             | <input type="checkbox"/>         | <input type="checkbox"/> |
| <b>Medical History</b>                                                  |                                  |                          |
| Chronic underlying co-morbidity (chronic kidney/liver/cardiac disease)  | <input type="checkbox"/>         | <input type="checkbox"/> |
| Peripheral Vascular Disease                                             | <input type="checkbox"/>         | <input type="checkbox"/> |
| Venous Insufficiency (1 of leg ulcer, venous eczema, phlebitis)         | <input type="checkbox"/>         | <input type="checkbox"/> |
| Diabetes mellitus (either Type 1 or 2)                                  | <input type="checkbox"/>         | <input type="checkbox"/> |
| Intravenous Drug Use                                                    | <input type="checkbox"/>         | <input type="checkbox"/> |

## Patient Questionnaire:

**Please complete the following questionnaire to the best of your ability. Details about this study will have been given to you in the information leaflet. If you have any queries regarding the questions asked, please ask for help from the doctor or nurse treating you.**

Your phone no.: Mobile \_\_\_\_\_ Landline \_\_\_\_\_

Next-of-kin phone no.: Mobile \_\_\_\_\_ Landline \_\_\_\_\_

GP name: \_\_\_\_\_

Age: \_\_\_\_\_ years

Gender: Female  Male

Are you a smoker: Yes  No

Your weight: \_\_\_\_\_  
(circle: kg or stones or lb)

Your height: \_\_\_\_\_  
(circle: ft or cm)

What part of your body is affected by this infection? \_\_\_\_\_

In the past year, have you had a similar infection in the same part of your body as now?  
\_\_\_\_\_ Yes  No

Have you ever had surgery, of any kind, to the same part of your body that is now infected? \_\_\_\_\_ Yes  No

Were you referred by your GP? \_\_\_\_\_ Yes  No

Did you notice any uncontrolled shivering of your body? \_\_\_\_\_ Yes  No

Did you have a fever at home prior to coming to hospital? \_\_\_\_\_ Yes  No

Choose a number from 0 to 10 that best describes your current pain.

"0" would mean 'No pain' and 10 would mean 'Worst possible pain'.

**Mark the chart below** at the number that best describes your current pain.

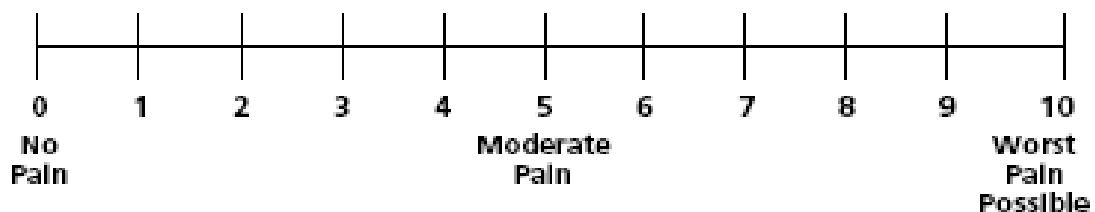

## Second Study Recruiter

Please examine the patient and complete the following variables

Patient enrolment ID number: \_\_\_\_\_

Location of infection \_\_\_\_\_

Length ("aligned head to toe") \_\_\_\_\_ cm      Width ("max diameter") \_\_\_\_\_

|                                                                         | Yes                      | No                       |
|-------------------------------------------------------------------------|--------------------------|--------------------------|
| Purulent discharge                                                      | <input type="checkbox"/> | <input type="checkbox"/> |
| Fluctuance from abscess                                                 | <input type="checkbox"/> | <input type="checkbox"/> |
| Lymphangitis                                                            | <input type="checkbox"/> | <input type="checkbox"/> |
| Ulcer                                                                   | <input type="checkbox"/> | <input type="checkbox"/> |
| Wound (surgical or traumatic)<br>Please specify _____                   | <input type="checkbox"/> | <input type="checkbox"/> |
| Athletes' Foot<br>(Interdigital skin breakdown/exudate in >1 web space) | <input type="checkbox"/> | <input type="checkbox"/> |
| Fungal nail infection in affected leg (if applicable)                   | <input type="checkbox"/> | <input type="checkbox"/> |
| Skin breakdown due to underlying skin condition                         | <input type="checkbox"/> | <input type="checkbox"/> |
| Chronic limb oedema (including lymphoedema)                             | <input type="checkbox"/> | <input type="checkbox"/> |
| <b>Medical History</b>                                                  |                          |                          |
| Chronic underlying co-morbidity (chronic kidney/liver/cardiac disease)  | <input type="checkbox"/> | <input type="checkbox"/> |
| Peripheral Vascular Disease                                             | <input type="checkbox"/> | <input type="checkbox"/> |
| Venous Insufficiency (1 of leg ulcer, venous eczema, phlebitis)         | <input type="checkbox"/> | <input type="checkbox"/> |
| Diabetes mellitus (either Type 1 or 2)                                  | <input type="checkbox"/> | <input type="checkbox"/> |
| Intravenous Drug Use                                                    | <input type="checkbox"/> | <input type="checkbox"/> |

In your opinion, what is the most likely diagnosis? \_\_\_\_\_

In your opinion, will cure be achieved with oral antibiotics?      Yes  No

### Telephone follow-up

Day post enrolment: Day \_\_\_\_\_

*Regarding the infection for which you were treated with antibiotics, has there been a decrease in the size of the area of infection by at least 50% from when you were first treated?*

**Increase**                            **Decrease**     

*Do you believe your infection has been cured?*

**Yes**                            **No**     

*Have you received antibiotic injections directly into a vein (intravenously) for your infection since your first assessment?*

**Yes**                            **No**     

*Have you required a second course of antibiotic tablets from your GP or from another doctor since you were first treated in the Emergency Department with this infection?*

**Yes**                            **No**     

*How have you felt since your first visit?*

**Well**                            **Unwell**     

*(Any adverse events should be recorded at this point in time. Describe in detail any untoward (unexpected or inappropriate) medical event regardless of its causal relationship to study treatment.)*

*Adverse event description* \_\_\_\_\_

*Date of onset* \_\_\_\_\_

*Duration* \_\_\_\_\_

*Resolution* \_\_\_\_\_

*Severity* \_\_\_\_\_

*Outcome (Recovery, continuing, worsening, death)* \_\_\_\_\_

*Relationship to treatment for cellulitis?*

*Unrelated/Possible/Probable/Definite* \_\_\_\_\_

*Did you require a change in your antibiotic prescription due to a skin rash or other side effect (such as diarrhoea, nausea, vomiting, thrush)?*

*Please*

*specify* \_\_\_\_\_

\_\_\_\_\_

\_\_\_\_\_

*Does the patient wish to receive the final study results?*

**Yes**                            **No**     

*If yes, specify lay summary, full manuscript or both* \_\_\_\_\_
